# Supplementary material for: The Association between Rapid Weight Loss and Body Composition in Elite Combat Sports Athletes
Source: MDPI journal article supplement (doi:10.3390/healthcare10040665), 2022-04-01
Supplement: s1 [file s1]

## SUPPLEMENTARY: TABLES

**Table S1.** Frequency analysis (in percentage) of the weight loss methods reported by the combat sport athletes.

| Method                             | Never | Do not use anymore | Almost never | Sometimes | Always |
|------------------------------------|-------|--------------------|--------------|-----------|--------|
| Gradual dieting                    | 52.6  | 31.6               | 5.3          | 7.9       | 2.6    |
| Skipping one or two meals          | 7.9   | 10.5               | 26.3         | 18.4      | 36.8   |
| Fasting                            | 21.1  | 21.1               | 10.5         | 28.9      | 18.4   |
| Restricting fluids                 | 5.3   | 7.9                | 13.2         | 42.1      | 31.6   |
| Increased exercise                 | 21.1  | 15.8               | 23.7         | 18.4      | 21.1   |
| Heated training rooms              | 23.7  | 7.9                | 23.7         | 21.1      | 23.7   |
| Sauna                              | 15.8  | 15.8               | 28.9         | 18.4      | 21.1   |
| Training with rubber/plastic suits | 39.5  | 7.9                | 21.1         | 13.2      | 18.4   |
| Wearing winter suit all day        | 73.7  | 10.5               | 7.9          | 5.3       | 2.6    |
| Spitting                           | 65.8  | 10.5               | 18.4         | 5.3       | 0      |
| Laxatives                          | 100   | 0                  | 0            | 0         | 0      |
| Diuretics                          | 92.1  | 2.6                | 5.3          | 0         | 0      |
| Diet pills                         | 100   | 0                  | 0            | 0         | 0      |
| Vomiting                           | 92.1  | 7.9                | 0            | 0         | 0      |

**Table S2.** Acronyms and terminology.

| Term     | Definition                            |
|----------|---------------------------------------|
| $\Delta$ | Delta                                 |
| AOR      | Adjusted Odd Ratio                    |
| Avg.     | Average                               |
| BIA      | Bioelectrical Impedance Analysis      |
| BF       | Body Fat                              |
| BW       | Body Weight                           |
| CI       | Confidence Interval                   |
| ECh      | European Athletics Championships      |
| LBM      | Lean Body Mass                        |
| LNOC     | Lithuanian National Olympic Committee |
| LSC      | Lithuanian Sports Centre              |
| LSMC     | Lithuanian Sports Medicine Centre     |
| Max.     | Maximum                               |
| MFMI     | Muscle and Fat Mass Index             |
| MM       | Muscle Mass                           |
| RWL      | Rapid Weight Loss                     |
| RWLS     | Rapid Weight Loss Score               |
| RWLQ     | Rapid Weight Loss Questionnaire       |
| SD       | Standard Deviation                    |
| SE       | Standard Error                        |
| WCh      | World Athletics Championships         |
